# Supplementary material
Source: Springer Nature journal article supplement (https://www.springermedizin.de/resource/supplementary/12886_2012_357_MOESM1_ESM.pdf/9473900)

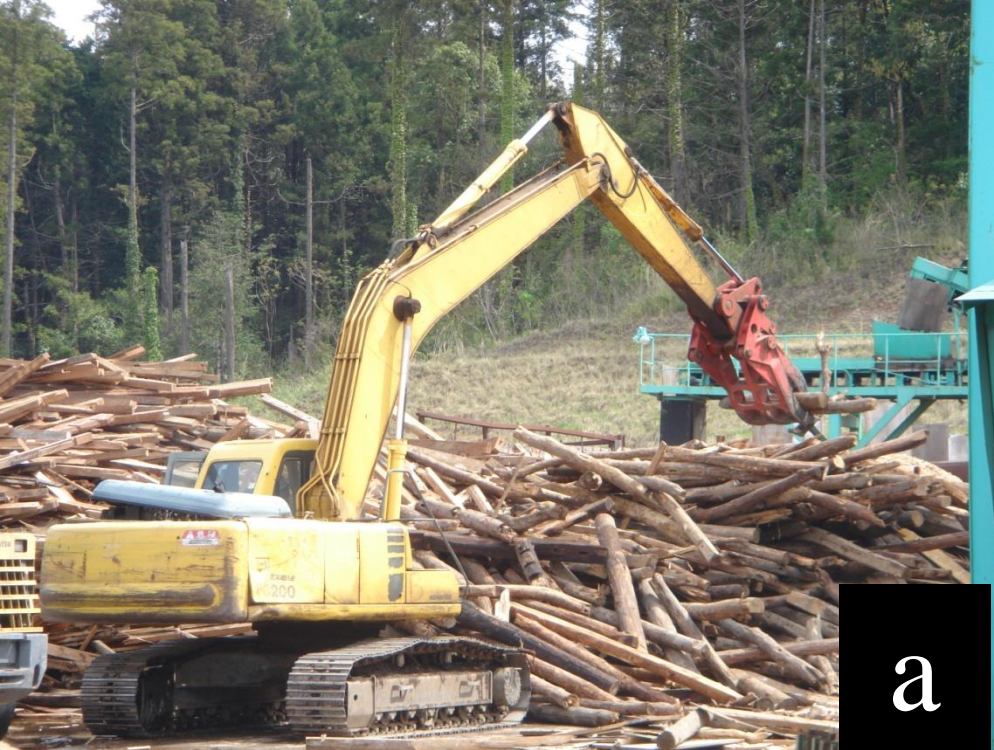

a

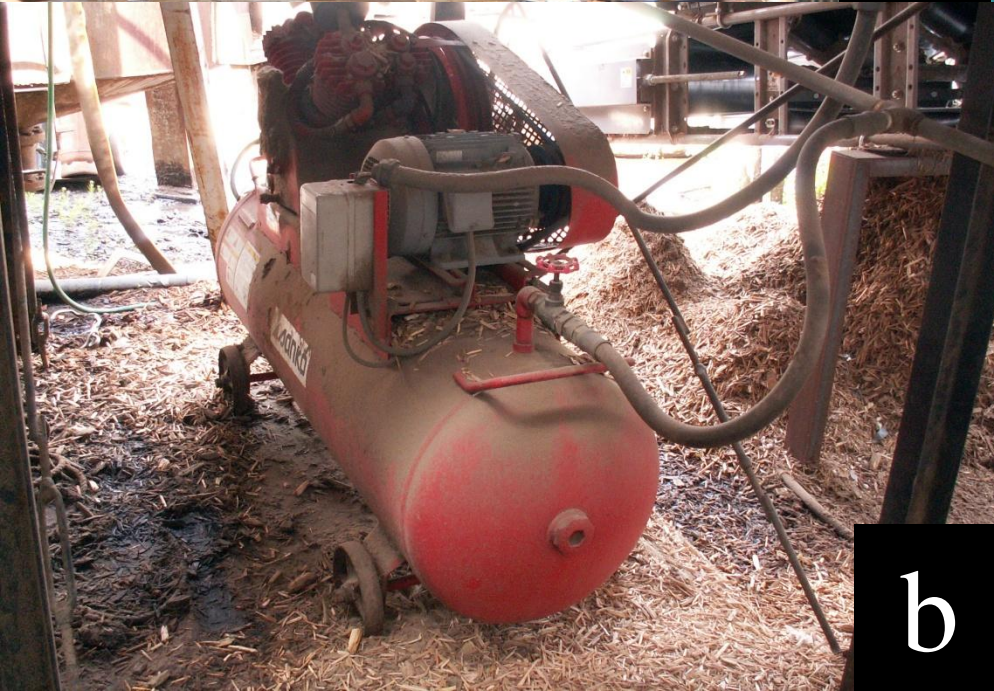

b

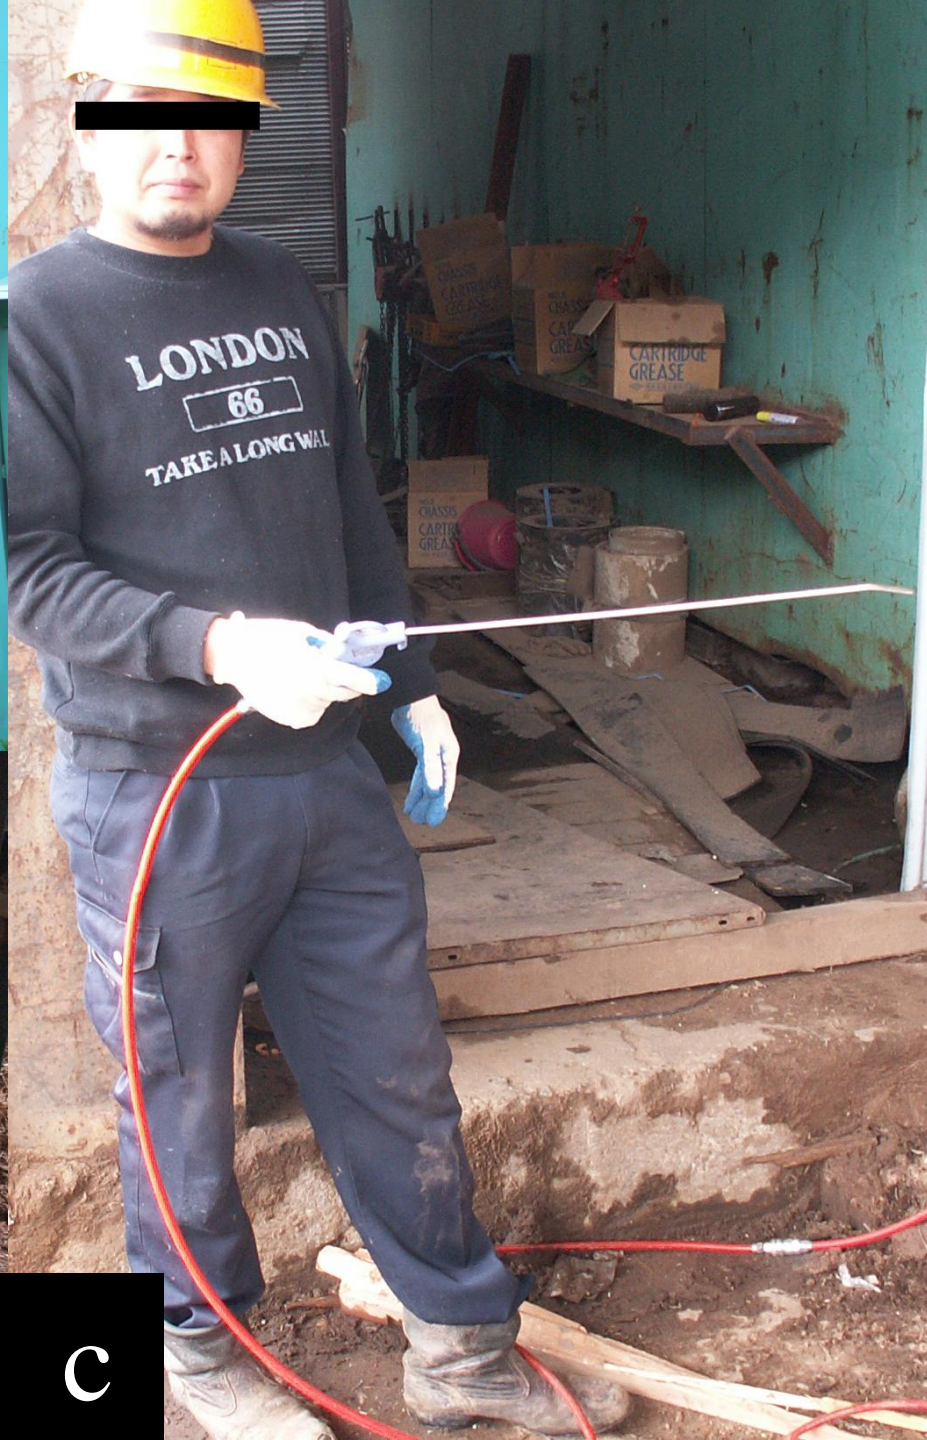

c

Supplement: MOESM1 [file 9473900]
